# Supplementary material
Source: Springer Nature journal article supplement (https://www.springermedizin.de/resource/supplementary/12885_2009_1651_MOESM3_ESM.pdf/9472554)

Log2(Cancer/Normal)

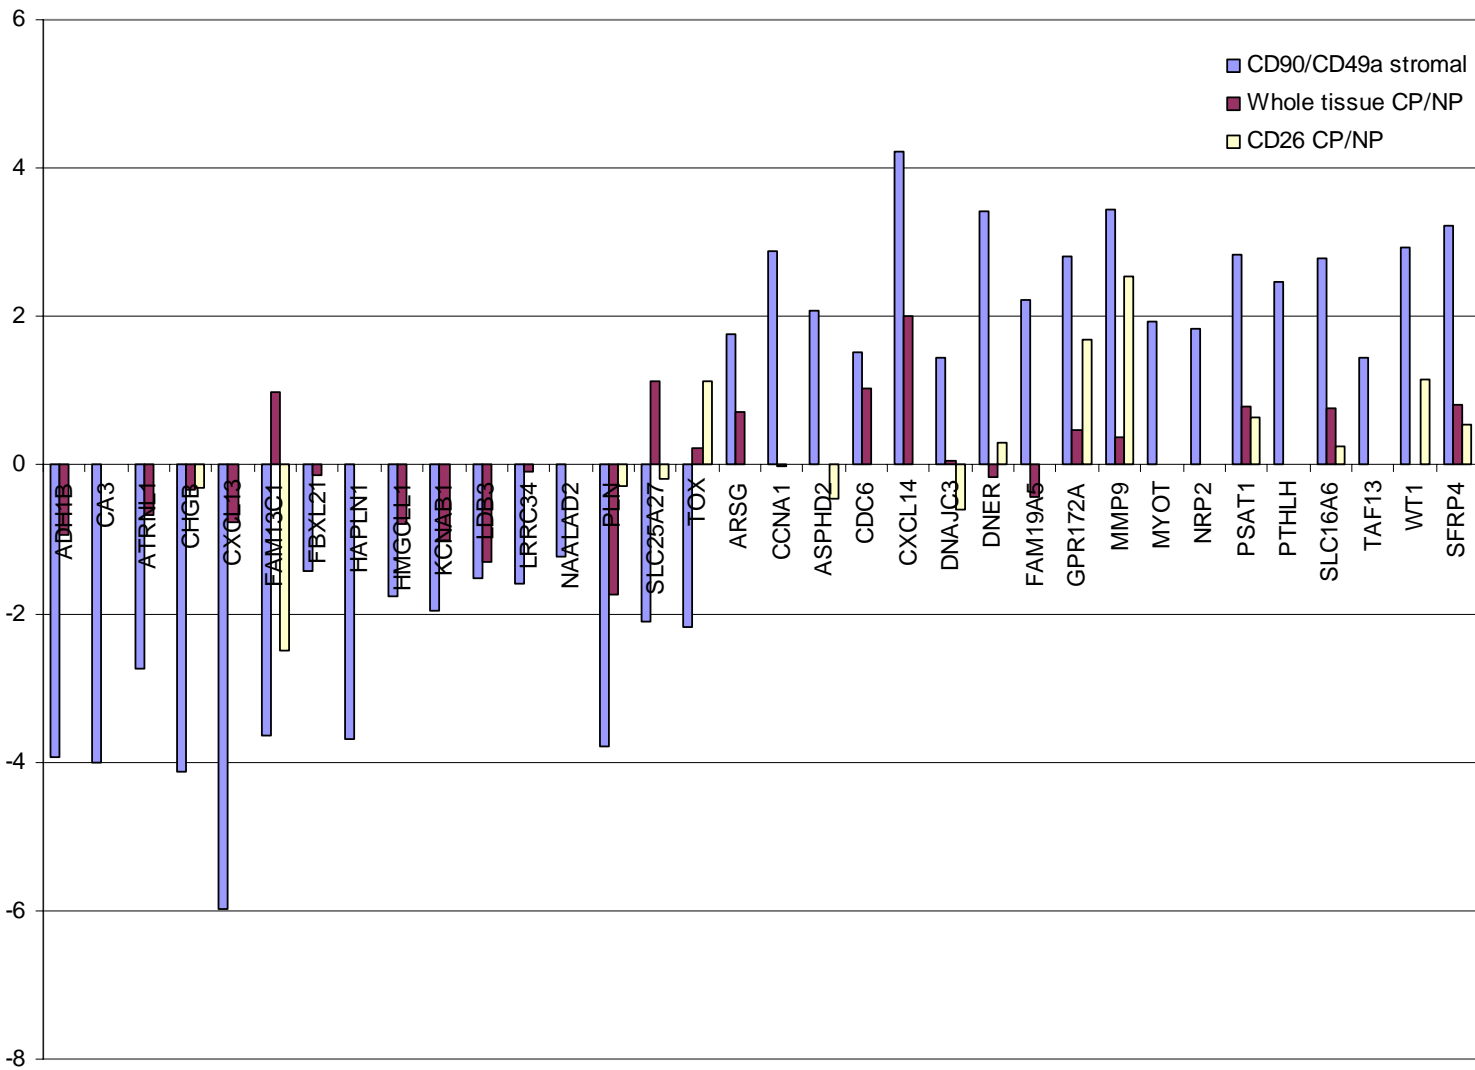

Supplement: MOESM3 [file 9472554]
